# Supplementary material for: Transcriptional and Post-Transcriptional Regulation of SPAST, the Gene Most Frequently Mutated in Hereditary Spastic Paraplegia
Source: PubMed Central journal article supplement (PMC3344893; doi:10.1371/journal.pone.0036505), 2012-05-04
Supplement: pone.0036505.s001.pdf [file pone.0036505.s001.pdf]

**Data Set 1. SPAST promoter-exon 1 sequences from twenty eutherian mammalian and one marsupial species that were used for multisequence alignments in this study.** Symbols are: bold red, consensus motif for NRF1 binding sites; bold green/yellow shade, consensus motif for SOX11 binding site; bold purple, consensus motif for Sp1 binding sites; bold pink, motifs proposed for Elk1 binding sites (see Canbaz et al. 2011), although these are poorly conserved (see **Fig. S1**); bold red and underlined, initiation codon for translation of the 68 kDa spastin isoform; underlined 20-22 nucleotide sequences (human and mouse), ChIP PCR primers; gray shade (human sequence), upstream transcription start site (TSS).

>human

GGCCAATTATCCTTCGGAGAAGACTTAGGTTCGCTGGCAGAAAAAGATGAAAGAAATCTAAGAAAACGACGACACTGAGAGAGGAGCCTAGCG  
AACCAGCAGAGCGACCCCAAGCCGCAATTCCCCCTTCGGTGGATCGATTACGAAGG**CTTCTGGC**AGGAGCTCTCCAGGGCTGCCGACGTGAG  
CCGAACTGCACATTGGGAAGTGTAGTTGAGTGGGAAAAGCCGAGAGGGCGGGGG**CGCACACGCGTA**CAGGGGCCCGGT**CAACAAAGA**CGCGCC  
GTGCGCGCGCGCCGGAGAAAAACACGGGAAGACG**TGCGCGTGC**CGCGCCGCTGGGAGCCACCAGGCGCGGAGAGGACAGC**GACAGGA**  
**AGGGAGGG**GCCCGAGCCACCGACTGCAGGAGGAGAAGGGGTTGTGCTCCTGGCCGAGGAAGGAGAAA**GGGGCGGGCCGGCGGG**CAGCGTGCG  
GCAGTGCAGGACTCTGAGACC**GGCGGG**CACACGGGGTCTGTGG**CCCCCGCC**TAGCAGTGGCTGCCGCCGTGCTTGGTTCCCGTCGGTCT  
GCGGG**AGCGGG**TTATGGCGCGCGGCAGTGAGAGCTGTGA**ATG**AATTCTCCGGGTGGACGAGGGAAGAAGAAAGGC

>marmoset

GGTCAATTATCATTTCGGAGAAGACTTAGGTTCGACTGGTAGAAAAAGATGAAAGAAATGTAAGAAAACGATGACATTGAGAAAGGAGCCCTGCC  
AACCAGCAGAGCGACCCCAAGCTGCAATTCCCCCTTCGGTGGATCGATTACCAAGG**CTTCTGGC**AGTACCTCTTCGGGGCTGCTGACGTGAG  
CTGAACTGCACATTGGGAATTGTAGTCGAGCCAGGGAAGGAGGAGGGGGCACCGCACACGCGTACAGGAGCCAGGT**CAACAAAGA**CGCGCC  
GTGCGCGCGCGCCGGAGAAAAACACGGGAAGACGGACG**TGCGCGTGC**CGCGCCGCTGGGAGCCACCAGCGCGCAGAGAGGACAGCGGC  
AAGGAGGGAGGGGCCAATCCACCGACTGCAGGAGGAAGAAGGGGTTGTGCTCCTGGCCGAGGAAGGAGAAA**GGGGCGGGCCGGCGGG**CAGC  
GCGCGCGGTGCGGAGCGCCGGAGGCCGGCGGAC**AGCGGGG**TCTGTGGCCCTAGCCGTGCGAGTGGCCGCTGCTGTGCTTGGTTGGTTCC  
CGTTGCTGCGGG**AGCGGG**TTATGGCGCGCGGCAGTGAGAGCTGTGA**ATG**AATTCTCCGGGTGGACGAGGGAAGAAGAAAGGCTCCGGC  
AGC

>macaque

TGAGATGTATCCTTTGGAGAAGACTAAGGTTCGCTGGCAGAAAAAGATGAAAGAACTAGGAAAATATGACACTGAGAGAGGAGACTCGCGA  
ACCAGCAAAGCGACCCCAATCCGCAATTCCCCCTTCGGTGGATCGATTACCAAGG**CTTCTGGC**AGGCGCTCTCCAGGGCTGCCGACGTGAGC  
CGAACTGCACATTGGGAAGTGTAGTTGAGCGGGGAAGGCCGAGAGGAGGGCGCCGCACACGCGTACAGGAGCCCCGGT**CAACAAAGA**CGCGCC  
GTGCGCGCGCGCCCGGAGAAAAACACGGGAAGACG**TGCGCGTGC**CGCGCCGCTGGGAGCCACCAGGCGCGGAGAGGACAGTGGCAGGA  
AGGGAGGGGCCGAGCCACCGACTGCAGGAGGAGAAGGGGTTGTGCTCCTGGCCGAGGAAGGAGAAA**GGGGCGGGCCGGCGGG**CAGCGCGCG  
GCGGTGCGGAGCCCTGAGACC**GGCGGG**CACACGGGGTCTGTGGCCCTCGCCGTGCGAGTGGCCGCCCGCTGCTTGGTTCCCATCGGTCT  
GCGGG**AGCGGG**TTATGGCGCGCGGCAGTGAGAGCTGTGA**ATG**AATTCTCCGGGTGGACGAGGGAAGAAGAAAGGC

>bushbaby

AGATACGCATGATAAGACTGATACGCATTTCTTCTTAGATGGATCAATTATCGTTTGAAGAAGATCTGGGTCCCTTGGCAGAAAATGATGAAA  
GAAATGTAAGAAAACAACGACACAAAAATATAGGGCCTGCGACCTAGCTTATCTACCCCAAGCCCAATTTCCCCCGCTGGGTGGGCACCT  
AGTTCCCCCGGGCAGTCCGGAGGCAAAGAACTCGGCACGCGACGGAGAGCTGGCCGATGGGAGCCGAACCTGCACATTGGGAATTGTAGT  
TCCTCGGGG**AGGGGGCGGG**CGAGCGCGAGCGC**CGCACACGCGCA**CGAGAGCCAGGT**CAACAAAGA**CGGCGCGTGCAGCGCGCGGAGAAA  
ACACAGGAGAACG**TGCGCGTGC**CGCGCGCCGCTCGGAGCTATCAGGCGGCTGAGAGGACAGAGGGAGGGAGGGGCTGGAGCCTTCGACAGCT  
GGAGAAGGAGACCGGTTGTGCTCCTGAGCGCGGAAGGAGAAA**GGGGCGGG**CCGGCGGACAGTGTGTGAAGGTGCCGAGCTCTCGCGCCGG  
CCGGCGCGCGGGCTGTGTGGCCCTAGCCGTGCGAGTGGCCGTGCGCGTCTTTGGTCCCCGTGCGGTCTGCGGG**AGCGGG**TTATGGCGCGCG  
CGCAGTGGGAGTTGTGA**ATG**AATTCTCCGGGTGGACGAGGGAAGAAGAAAGGCTCCGGCGGCCCCAGC

>pig

TTCAGATAATAATCCAGATTGGGACCCATTACTTCCGCAATGAACTCATATCAATCATTCTTCGTGGAAGATTGGCAGAAAATGTTGAAA  
GAAATATAAGAAAACGAGGTCTCTGCAAGAGAGCCCTGCCGAGCGGTCCATTTCTGAGTCGACGTCCTAGGTGCCCTGTAAGGAGCTCCC  
CGGGCAGCGAAGTTGACTGGCCACCTGTCCCTTAAAGACGACGTAGGCTGAAGTGATATTGGGAAATGTAGTTCCCCGGGGAAGCGATAGCG  
**AGGGCGGGCCCGCACACGCGCA**CTAGGAGCTCAGGT**CAACAAAGA**CGGAGCGT**TCGCGCAGGCGCC**GAGAAAGACACGGGAGGGCG**TGCGC**

**GTGCACG**CGCGGCCGCCCTCGGAGTTACCAAGCCGAGAGAGGACGGAGAAAGGGAGGGGCGAGGAGCTACCGACCAAAGGAGGAGGAGAAGG  
GGTTTGTCTCCTGACCTAGCGAGGAGAAA**GGGGCGGGG**CCGTCCAGCTGCGCGCGGAGGTGCAGAGCTCCTGGGACC**GGCGGG**CGCGCGGGG  
TCTCGTGGCCCTTGCCTCCAGTAGCCGCGCCGCTCGCTTGACCGCCGCTCGGTCTGCGGAA**GGCGGG**TTATGGCGGGCGGGCAGTGGGAGC  
TGTGA**ATGA**AATTCCTCGGGTGGACGAGGGAAGAAGAAAGGCTCCGGCGGCCCCAGCAGCCCGGTGCCTC

>horse

TTACTTCCGAGATGGAACCTCAGATCAATCATCCTTTGCGGAAGACTGACAGAAAATGCTGAAATAAATAAGAAAACGATGACACTGCAAGA  
TAGGACCCCTGAGAACATGCCGAACGACCCCAACCCGAGTTGTCCCTTCCGTGAGTTTCATGACCAAGGCTCCCTGCAAAGGAGCTCTCAGGG  
GCAGCTTAGTTGCCAGAGCGACAGTCCCTGAAGACGTCGTAGACCGAACTGCACATTGGGAATTGTAGTTCTGCGGGGACGGGACCTAGTGG  
CTGGAGC**CGCACACGCGCA**ATAGGAGCTCAGGT**CAACAAAGA**CGGCGTCTGCGCGCGCACGCCGAGAAAGACACGGGA**GGGCGTGCGCGT**  
GCCGACGCTGTAGCTACCAGCGACTGAGAGGACAGAGTAGAGGGAG**GGGCAAGCGC**CACCGACCCGAGGAGGAGAGAAGGGGTTGTGTCTC  
TGGCCGAGCGAGGAAAG**GGCGGGG**CCGGCAGAGTGCCTGGAGTCCCGAGCTCCTGGGACC**GGCGGG**CGCGCGGGGTTCTGTGCCCT  
CGCGTCCCAGTGGCCGCGCTCGCTTGGTCCGCTCGGTCTCGGGGA**GGCGGG**TTATGGCGGGCGGGCAGTGGGAGCTGTGA**ATGA**AAT  
TCTCCGGGAGGACGAGGGAAGAAGAAAGGCTCCGGCGGCCAGCAGCCCGGTGCCTCCAGGCCCTCCG

>cat

ACACTGAGAGTGTTCATGTTACCCATTACTTTTGGAGATGGAACACAGGTGAACCATCCCTTGCAGAAAGACTGGCAGAAAATGCTGAAAGAA  
ATATAAGAAAACGATGACAGTGCAGATAGGAGCCCTGCGAACTAGGAGAACGACCCCAAGCCGACGCTGTACCCGCTGCGTTGAGGAGTTGA  
TGACCAAGGTTCCCTGCTAAGCAGTTGCCGGGGACAGCGTTGTCTAGTAGAGCGACAGTCCCTGAGGACAACGTAGCCGAACGTACCTTGGG  
AACAGTAGTCCCGCTGGGAAGGGCCAAAG**GGCGGGAACTGCACACGCGCA**TAGGAGCTCGGGT**CAACAAAGA**CGGCGCGTGCAGCGCGC  
GCCGAGAAAGACATGGGTGTGCG**TGCGCGTGCGCG**GTACCCTCGGAGCTACCAGGAGGCTGAGAGGACACCGAGAG**GGCGGGG**CAGGAGC  
TACCGACCGCTGGAGGAGGAAAGGGGTTGTGTCTTTGGCCGAGCGCGGAGAAA**GGGGCGG**AGCCTGCGAGCAGCGCTGGAGGTGCCGAGCTC  
CTGGGACC**GGCGGG**CGCGGGGCTTGTGGCCCTCGCCGTCCCAGTGGCCGCCCGCTCGCTTGGTCCGCTGCTGCGGGAG**GGCGGG**TTA  
TGGCGCGGGCAGTGGGAGCTGTGA**ATGA**AATTCCTCGGGTGGACGAGGGAAGAAGAAAGGCTCCGGC

>ferret

GGAGACTAGCAGAAAATGCTGAAAGAAATATAAGGGCGATAGCACTGCGAGATAGTAGCCCTGCGAACCCGTCGAGCGAGCCCAAACCGCAGC  
TGTCCACAGGTAATTTGATGACTGAGGTTTTCAGTTTAAAGCAACTCTCCCGGATAGCGTAGTCTGTAGAGCGACGGATCCCCAGGGGTGAC  
GTAGCTGAATTCACCTTGGGAACGTAGTTCCACACGGAAGAGCCCGA**GGGGCGGGAGCTGCACACGCGCA**CTAGGAGCTCAGGG**CAACAAA**  
**GA**CGGCGGCTTGCAGCGCGCGCTGGAGAAAGACATGGGCAGGCG**TGCGCGTGCGCG**GCCACAGCTCGGAGCTACCAGGAGGCTGAGAGGACA  
CAGAGCGGGAGGGGACGAACCACCGACCGCTGGAGGAGGAAAGGGGTTGTGTCTTGGCCGAGCGAAGAGAAA**GGGGCGGGG**CGCGGAGCA  
GCGCGTGGAGGTGCCGAGCTCTCGGAACGGCGGACGCGCGGGGCTTGCAGCCCTCGCTGTCCAGTGGCCGCCCGCTGGCTTGGTCCGCT  
CGTCTGCGGGAG**GGCGGG**TTATGGCGGGCGGGCAGTGGGAGCTGTGA**ATGA**AATTCCTCGGGTGGACGAGGGAAGAAGAAAGGCTCCGGCGGC  
TGCAGCAGC

>dolphin

AACTGCTGTCTCTCATAATAATTAATAAATTTGGGACCCATTACTTCTGTGATGGAACCTCAGATCAACCAGCCTTTGCGGAAGACCTGGCAGA  
AAATGCTGAAAGAAATATAAGAAAATATGACACCGTAAGATGGCCCTGAGAAAATAGCCGAGCGACCCAGGCTGCAGCGGTCCCTCCAGTGA  
GTTGATAGCCTAAGTTCCTGCTAAAGAGCTCCCAGGGTCAGCGAAGTCTGACTGAGCGACCCGCTCCTATGGCAGACGTAGGCCAACTGCGC  
ACTGGGAAATGTAGTTCCATGGGGAAGGGACGGAGT**GGCGGGAGC****CGCACACGCGCA**CTAAGAGCTCAGGG**CAACAAAGA**CGGCG**GCGTGTGC**  
**GCACGCGC**CTGAGAAAGACTCGGGAGGGCG**TGCGCGTACGCGTGCGCG**CCCGCCCGGTTCTGAGCTACCAGCGGCTGAGAGGACAGAGAG  
GGAGGGCAGGAGTACCAGCCGAGGAGGAGGAAAGGGTGTGTCTCTGGCCGAGCAAGGAGAAA**GGGGCGGGG**CTGGAGAGCAGCGCGC  
CGGGTGCAGCTCCTGGGACC**GGCGGG**CGCGTGGGGTCTGTGGCCCTTGGCCCTCCAGTGGCCGCCCGCTCGCTTGGCTGCCGTCCGCT  
TGCGGGAG**GGCGGG**TTATGGCGGGCGGGCAGTGGGAGCTGTGA**ATGA**AGTTCTCCGGTGGACGAGGGAAGAAGAAAGGCTCCGGCGGCCAG  
CAGCCCGGTGCCTCCAGCCCT**CCGCCCC**ACTGCCT

>dog

TTTGCAGGAGACGGGCAGAAAATGGTGAATGGACTGTAAGAGCGATGACACCGCGAGCCGGGAGCCCTGAGAACCAGGCAAGCGCGACCCAA  
GGCCAGCTGT**CCCCCGC**GAGAGCGGTGGCCGAGTCCCCTCTGCCGAGCGGCTCCCGCGACGGCGCTACCCGTAGAGCGACGATAACCGA  
GGACACGTAGCCGAACCTGGACGTTGGGAATTGTAAAAGGCAGCGAAGGGGCGCGAGGGGCGCGAGC**CGCACACGCGCA**GTAGGAGCTCGGT**C**  
**AACAAAGA****GGGCGG**CGTGCAGCGCGCGCCGGCGAAAAGCCATGGGCAGGCG**TGCGCGTGCGCGTGCGCG**GCCACCCTCGGAGCTACCAGGAG  
GCTGAGGGGACGACAGCGGGAGGGGACGAGCCGCCGACCGCAGGAGGAGGAAAGGGTGTGTCTCTGGCCGAGCGAGGAGAAA**GGGGCGG**  
**GGCCGGCGGG**CAGCGCTGGAGGTGCCGAGCTCCTGGGCC**GGCGGG**CGCGGGGCTGTGTGCCCTCGCCGTCCAGTGGCCGCCCGCTC  
CTTGGTCCCGTCCGCTGCGGGAG**GGCGGG**TTATGGCGGGCGGGCAGTGGGAGCTGTGA**ATGA**AGTTCTCCGGTGGACGAGGGAAGAAGAA  
GGCTCCGGC

>cow

AACTGAGATCAACCATTCTTATGGAAGACCAGCAGAAAATGCTGAAAGAAATATAAGAAAACGACGACACCCCAAGTCTACAACTAGCCG  
AGGGACCCCAAGCTGCAGCGGTCCCTTTCTTGTAGTTAACGGTCTAGATGCCCTGATACTGAGTTACCAGGGTACGCGAAATCGATTGAGCTAC  
GGTCCCTAAGGGGTAAGTAGGCCAACTGCATACTGAAAATGTAGTTCCGCGAGGGAAGGGAGGAATGGCGAGCGG**CGCACACGCGCA**CAA  
GGAGCTCAGGG**CAACAAAGA**CGGCGACGTG**CGCGACGCGC**CGGATAAAGAGTCCGGAGGGC**TGCGCTTGCGC**TCCCGGCCCGCTCTGAGC  
TACCGAACAGCCAAGAGGACAGAGAGAGGGAGGGGACGAGCCACCGACCGCCGAGGAGAAAGGGTGTGTCTCTGGACGAGCGAGGAGAAA  
**GGGGCGGGG**CCGGGAGCAGCGCGGAGGTGCACCGCTCCTGGGACC**GGCGGG**CGCGGGGCTGTGTGGCCCTTGGCCCTCCAGTGGCTGCC  
GCGTCTGGCCCGCTCGGTCTGCGGGAG**GGCGGG**TTATGGCGGGCGGGCAGTGGGAGCTGTGA**ATGA**AATTCCTCGGGTGGACGAGGGA  
GAAGAAAGGCTCCGGCGGC

>microbat

GGTACCCTACTGCTCTGAGACGGGACTCAGATTAATCATCCTTTGAGACAATACTGGAAGAAATCATTAACGATAACACTCGGAGAAAGGAG  
CCCTGTGAGCAAGCAGAACGACCTCAAACCTCAGCGGTCTTCTCTGGGACTCGGGGAACAAGTCCGACGCAAGGAGCTCCAGGCGCAGC  
CAAGTCCGGCCGAGCTCGGCCCTTGACGACGACGTAGAGCCAACTGCACGTTGGAACTGTAGTTCCACGGAGAAAAGGACCGAGGGGAGAAC

GC**CGCACACGCGCA**CGAGGAGCTCTGGG**CAACAAAGA**CGCCGGCGTGC CGCGCGCGCCGGAGAAAGAGA**GGGGCGGGCGTGACGCGCG**GCC  
GCGGCTCTGAGCTCCTAGAGGCGGCCGAGAGGACAGAGAGAGGGGAGGGGCAGAAGCCACCGACCTCAGGAAGGGAGAAGGGGTTGTGCTCTTG  
GCCGCACGCAGAGAAA**GGGGCGGGGCGGGCGGGGCGCGAAGGTGCCGAGCTCCCGGGACCGGCCGGCGCGGGGGCTCTGCGGCCCTCG**  
CCGTCCAGTGGCCGCTGCCGTCAATTGGTGC CGCTCGGTGTGCGGGA**GGCGGGT**TATGGCGCGCGCCAGTGGGAGCTGTGG**ATG**AATTCT  
CCGGTGGACGACGGAAGAAGAAAGGCTCCGGCGGCCCCAGCAGCCCGGTGCCCTCCAGGCCCTCCGGCC

>megabat

GGGACTCAAGTCAATCATCCTTTGCGGAAGACTGGCAGATAATGCTGAAAGAAGTACGTATAAGAAAACGATGACACTCTGAGATAGAAACCC  
TACGAAACAGCCGAGCAACCCCAAACAGCAGCCGTCTCTTCTGTGAGTTAATGACTAAAGTTCCAGCTAAGAAAACCTCCAG**GGGGCGGT**TAAA  
CCCGCAGAGTGACAGTCCCAGGAAGACAACGTAGAGAAGAACTGCACATCGGTAACCGTAGTTCCCGGGGAAGGGAGAGAGTGGCGGACGC**CG**  
**CACACGCGCA**TAGGAGCTCAGGG**CAACAAAGA**CGGCGCGTGC CGCGCGCCGGAGAAAGACAC**GGGGCGGT**GTGCGCGCACGGCGCCGCTC  
TGAGCTATATCAGAGCGGATGAGAGGACAGACCGGGGAGGACAGGATCCCGGACCGCTGGAGGAGGAAGGGGTTGTGCTCCCGGCC  
TGCGGAGGAGAA**GGGGCGGG**CCGGCGCACCGCGCTGAAGAGGCGAGCTCCCGGGCCGGCCGCGGTAGTCTGTGGCCCTCGCTGT  
CCCAGTATCCGCTGCCGTGCTTGGTGC CGCTCGGTCTGCGGAA**GGCGGGT**TATGGCGCGCGCCAGTGGGAGCTGTGA**ATG**AATTCTCCG  
GTGGACGAGGGAAGAAGAAAGGCTCCGGCGGCCCCAGCAGCCCGGTGCCCTCCAGGCCCTCCGCCCTCTT

>rabbit

ATACTACTGCTCCTGAATTCAGACCAATCAACCTTTGTAATAGACTGAAAGTCAACTGGCAGAAAATGATGAAACCATGACACCCGAGAGATAG  
AAGCGTGC AAACCTACTAGCAGCCCAAGCCCGCTCTCCCTATTCAAGGAGTAATTC CCGAGCTTGCTGGTAGGAGCTCCAGGGCAAGC  
CCGTCCGCGGAGCTACATGGGAGTCGAAGTGCACCTTGGGAAGTGTAGTTCCACGAGGAAAGGGCCGAGTGGCAGGGCGC**CGCACACGCGCA**  
AGAGACCAGGT**CAACAAAGA**CGGCGCGCTG**CGCGCGTGC CGCGCGCGGAGAAAGGCACGGAAGGGCGTGCGCGTGTGCGTGC CGCG**  
GCTCGGAGCTTCTTGGCGCTGAGAGGACGGAGAGAAGGGGGGTTGGAGCCACCGACCGAAGGAGGAGGAGGAGGAGGAGAAAGGGTTGTGC  
TCTTGGCCGAGCGAG**GGGGCGGG**CCGGCGGGCGGTGCAGGTGCCGAGCTCCTGGGA**CCCGCC**GGCGTGC GGGGGGTCTGTGGCCCTCGCC  
GTGGAAGCAGTGC CGCCGTGCTGGTGC CGCTCGGTCTGCGGAA**GGCGGGT**TATGGCGCGCGCGCCAGTGGGAGCTGTGA**ATG**AATTCTCCG  
TCCGGTGGACGAGGGAAGAAGAAAGGCTCCGGCGGCCCCAGCAGCCCGGTGCCCTCCAGGCCCTCCGCCCTCTT

>tenrec

ACTTTTCTCGCAGTAATATTTCTAATTC CAGATTGATACGCATTTGCTAGATGGAAC TAAAATAATGATGAAAGAAATAGTAGTGAAGAA  
AACGATGACATCGCGGATTATGAACCTAAGAGCTAACCTAGGGGCTTCAATCGCACTGCCACTTTCCCGGACCGGGAGCCAACCACTGG  
GAAACGAGGGAAGTCTCTGAAAAGACACAGCCCAAAGCGTCTGCTGCGAATGCATGCTGGAACTGCAGTTC CGCGGGGAATGGCCGTG  
CAGCAGGCAC**TGCACACGCGCA**TTAGAGGAAGCCCGCG**CAACAAAGA**CGGCG**GCGTGTGCGCGTGC GTG**CGCCGAGAAAGCCTCGGAAGAAG  
CG**TGCGCGTGC GTG**TGCTGCGCTGCGCTACCAGCGCGCGGAGAGTACAGCGAGAGGGAGGGGCTGGTGTGAGACCGGCCGCTGGAGAAGAG  
GTTGTGCTCCTCGCCCTCGGAAGGAAGAA**GGGGCGGGG**CCGGCGGGCCGCGCTGTGGAGGTGCCGGCTCTAGGGACC**GGCGGG**CTCGCGGC  
GTCCGTGGCCGTGCTTCCGGCTGCTGCCGTGCCTGGTGC CCGCTCGGTCTGCAAG**GGCGGGT**TATGGCGCGCGCGCCAGTGGGGGCTGTGA**A**  
**TG**AATTCTCC**GGGCGG**ACGAGAGAAGAAAGGCTCCGGCGGCCAGCAGCCCGGTGCCCTTCCAGGCCCT

>guinea\_pig

ATTTTTCGTTTGAGGGTGACATTTGTCTCTCCGACTGATGTGCGCTCAGGTAATAATTTCCGGATTCACTCATACTGTGATCATTTTTCGCT  
AAGACTGACACAATAAAACACTGATACTGGGAGATAGGACCCACGCCAAGCCGGGCTTCTTCTTCCAGTACAAGCTTCGCTACTCCGAACCC  
CCAGGGCCGAGACGTCAATCACAACCCCTAGTCCGAGACCCACTCGAGTGAAACTGCAGATCCCTGGGGAAGGGGCAGAGAGA**GGCGGGT**C  
**CGCACATGCGCA**CAGGACTGCAGGT**CAACAAAGA**CGGCGAGCGCGCGCACGCTGAAGCAGGACCGCGGAGAGCG**TGCGCGTGC CGCG**  
CCGCTTACGTTACCGGGCATTAGAAAAGGACAGAGGGAGCGAGGGGCTGGAGCCGTGACCCGCGGAGAAAGCGCTGTGCT**CCCGCG**  
ACGGAAGGGCA**GGGGCGGGG**CCGGCGGGCGCGCTGCAAGTGCCTGCGGCTGAGCCCGCGGGGGTCCGTGGCCCTCGCGTGGCAGTGGC  
CGCCGTGAAGCTTGGTGC CGCTCGGTCTGAGGGAGGCGAGTTATGGCGACGGCGCAGTGGGAGCTGTGA**ATG**AGTTCTCCGGTGGACGAG  
GGAAGAAGAAAGGCTCCGGCGGCCCCAGCAGCCCGGTGCCCTCGCAGGCCT**CGCCCCCT**TGCCCGGCC

>pika

TTCAGATCAATCAATCTCTGCAAAAGACGAAAAGTCAACTGGCAGAAAACGATGAAGCCTTGACACAGAAAGCCTTGCTAACCAGCGCAGTA  
ACCCCAATCCGCAACTTTGTCCAGGAATCAAGGATGACGCCCCAGTGCCTGGTAGGAGTTCCAGGGCAAGACCGCGCGGAGTCCACG  
TCTGAAGTGACATTTGGGAAATTTTATTTCCGCGACAAAGGGCGAGGGGCAGGC**CGCGCACACGCG**CAAAAGAGCCCAAGT**CAACAAAGA**C  
GGCG**GCGTGTGCGCG**CGCGCTGCGGAGAAAGGCACGGAAGGGCA**TGCGCGTGC CGCG**GCCGGCGCTCGGAGCTCCTGGCGCCTGAGAGGAC  
GGCGGAGCAG**GGGGGG**TTGGGTTACCGACCGCAGGAGGAGGAGGAGGAGGAGGAGAAAGGGTTGTGCTCTCGGCCGAGCG**GGGGCGGG**CC  
GC**GGGCGG**CGCAGCAGGTGCAGGGTACC GGGA**CCCGCC**GGCGCGCAGGGTCTTGGCCCTCGCGTGCAGCAAGTGGCCCGCTCGCTG  
GGTCCCTTGGTCTGCGGGAG**GGCGGGT**TATGGCGCGCGCGCGCGCAGTGGAAAGCCGTGA**ATG**AATTCTCCGGTGGACGAGGGAAGAAG  
AAAGGCTCC

>mouse

CCTTCTCAGCTACAAGAGGAGTTGGAGGTCAGCATCTCACACAAAGGCAAACAACCGCACTGCGGACAGCAGACCTGAGCACTAGTAAAGC  
CACTCAAACGCTGTTAAACCCCATTTAAAAATTTATTATCAAAGCTCCCTATTCCGATTCTTCAAAAAGTGAAGAACCTGCGGAGCGACGAAC  
CCCTGGGACCATCGCAAGCCGAACCGCGCTACAGAACTGAGGTTCCAGAGAAAAGGGGCATAGCAGGGGCGTGGGGGTAGGAGGATGC**CGC**  
**ACATGCGCA**CAAGCTCCAGGT**CAACAAAGA**CGGCG**GCGTACGCGCG**CGCACCCAGAGCCATTACCAGAGACG**TGCGCGTGCCCG**GCCGCCG  
AGCGAGGTCCAGCGGCCAGGGGACAGAAGGAAAGGAGGGGACAGGAGCCACCGGCCCG**GGCGGG**AGGAGGAGGAGGAGGAGGAGGAGACGGG  
GTTGTGCTCCTGGCAGCTGAGGAGCGA**GGGGCGGGG**CCGGCGAGCGCGCTGCAGGTGCCAGGCTCCGGGCTCCGGCTGGCGCGCGAGCG  
GCTCCGTGG**CCCCCGCC**GCCCGAGTGGCAGTGGCCGCCCGCCCGCTTGGTTCGCGGTGCGGGAAGCGGGTTATGGCGCGCGCGC  
GCAGTGGGAGCTGTGA**ATG**AGTTCTCCGGCCGACGACGGAAGAAGAAAGGCT**CGGGCGG**CGCGAGCC

>elephant

TTTCTATATACGGGTTGCTTTTTAGATGGAAC TACAGCAATCACCTTTGGAGAAGACTTGTGACTCAACTGACAGAAATGACGAAAGAAACGT  
TAAGTACAGAAAACCTAAACATTTGTGAGATATGAGCCCTGGGAACTAGCCGAGGACCCCTGAGAACAGTGC CCCCCTCCCTGGGCTGATAGCC  
AATGTTCTGGCTATGAAGGAGTCAAGCAGCTCGGTGCCCGAAGTCCGCGAGGCTCAGAATGCACGCTATGACCGGCAGTTACTTGGAACT

GGCGC**CGCTACGCGCA**CTAGAACCCAGGTCGACGAAGATGGCGCTTTAGAAAG**CCGCC**CAAGAAATACATGGAAAGACG**TGCGCGTGCGCGC**  
CAGTGAAAGACACGAGGGGAGGGGCG**TGCGCGTGCGCGC**CCAGGGAGAGACACGGAGGAAGAGACG**TGCGCGTGCGCGC**CAGCTGTAGCACTGAG  
CCACCAGGCACTCCGGAAGACAGAGGGAGGTAGGGGTGGAGCAACTGCTGGTGT**CAGACTCCCGCATGAAAATGGCTTGTCTTCTGACTGAA**  
GAAGCC**GGCGGG**CAACGCGTGGAGCTGCCGAGCTTGGGGCCAGCGGGCGCGGGGGTTTGTGGCCATCGCCGTGGCCGCCCGCTGGCTTG  
GTCATCGTGGTTCTGCGGGAG**GGCGGG**TTATGGCGGCGCGGCAGTAGGAGCTGTGG**ATGA**AATTCTCCGGGTGGACGACGGAAGAAGAAAGGCT  
CCGGCGCCCCAGCAGCCCGGTGCCTCCAGGCCTC

>hedgehog

TGGGAGGAGAGGGAGAGAAAGAACCAGATATCACTCTGGTAAAGGTGCTGCTGGGACTGAACTCAGACAAGAGCCAAGAGACTTAGTTCCCGC  
AATCTCATCACGCAGTCTTTTGGGAGAAGATTGACTCTCCCTGGTAGATCTCAGGCCTTCCCTCCCCCACCATGGACGACGTCTGTATATG  
ATGTAAAGCGAGCAGCTGTACGCTGGGAATTGTAGTCTGCTGGGAGTAGAACGACCCGAGGTGGAGGGCGCA**GCACATGCGCA**CTAGGTGTTT  
AGGG**CAACAAAGA**CTAAGGCG**TGCGCTTGCGCA**TTGAGGATGAAAGAAAAAAAAAAAAAGACTGGAGGCCG**TACGCGTGCGCG**CGCGAGAGACC  
GCCGCTCCGAGCTGCCCGCAGCCGAGGGGACGCGGGTTCGGAGGGAGGGG**CAGGAGT**CGAGCCGGCGCCGAGGAGCGGAGAGGGGTTGCG  
CTCTCAGCCGGCCACAGGCGGCAACGAGGAAG**GGGCGGG**GCCGCGCGCCGAGGGGCGGAGCCCCGGGACC**GGCGGGGG**CGCGGGCCCTCGTC  
GTGCCGGGGCCACCACCGCCGCTCGGTGGCCCTGGCTCTCGGGTTATGGCGGCGGCGGACGCGGGGCTGTGA**ATGA**AATTCTCCCGCCGACG  
AGGAAAGAAGTCAGGCTCCGGCGGCGCCCGCAGCCCGGTGCCT**CCCCGCGCGCC**ACCGGCACGGC

>Monodelphis

GCCTTGACACAGTAGGTA**CTTAATAAATGCTAGT**TAATTAACCCAGGCAAGTTTACATATTGGAAAAGGAGGATAAAAAATAAGATTGTAGTG  
AGGTTCAAATTAGATAAATGGAAAAC**TCTTCGTCAATCTTAAAGGACTCATAAACG**CCAGTTATCATTAATCGACAAAGCACCAACAAGCAAAG  
ATAATTCCGAGTT**CAGGCTGGCC**TAAAGGGCTACAAAAGACGCTGGGACTTT**CAGCTT**CAGAGAAGGCGGAGCCTAGACGAGGT**GGGCGGGG**  
ATGAAAGGAAGGC**TGCACAAGCGCA**CCGCGGGAGCTCCTGT**CAACAAAGA**CCGAGGCAGCTCGTGAGCAACGGAGGCTAAGATCCTATGGAA  
CGTGCGCGTGTCCGCTCGCTGAGGCAGCCTATGAAAGGAGAAAGAAAGGACAGGACG**TGCGCGG**ACTGTCCCAT**TGCCTGAGCCTATGGCC**  
GTGAGAGAGGAG**GGGCGGGGCGGG**ACCAGGACAGATCCCGGACATCAAACCTGCTCGGGAGGGTTTCGGAGAGGGGGAGGTGACGCTT**CGGAC**  
CGAGGGAA**GGGCGGGG**CCGGGTGTGGAGGTAGCTGGAGCTCTGAGGACTCGCCCGACTGCTACCCAGCTTTGGTGCTTTGCCCTTCTCCTCC  
TCCTCTTGCTGCAGCACCAGCACCACCGCCGCTTGGT**CGCTGACAGCGGG**TTATGGCGGCGGCGG**CAGTGGGAGCCGTGA****ATGA**AATTCTCCG  
GGCGGCGGAGGAAGAAGAAAGGCTCCGGCACTGCCGCGCCCGCTGGGCCCC
