# Supplementary material for: Transcriptional and Post-Transcriptional Regulation of SPAST, the Gene Most Frequently Mutated in Hereditary Spastic Paraplegia
Source: PubMed Central journal article supplement (PMC3344893; doi:10.1371/journal.pone.0036505), 2012-05-04
Supplement: pone.0036505.s002.pdf [file pone.0036505.s002.pdf]

**Figure S1. Evolutionary conservation of the *SPAST* promoter in mammals identifies putative transcription factor (TF) binding sites.** **A)** Multisequence alignment for 19 eutherian mammalian species of the full-length *SPAST* promoter region into exon 1 and including the first translational start codon (a segment of 474-nt in human). In addition, *Spast* promoter-exon 1 sequence alignments are shown for **B)** tenrec and elephant, and **C)** western European hedgehog and a marsupial, *Monodelphis domestica* (the tenrec and hedgehog sequences are also shown in **A**). Despite a high degree of nucleotide conservation, elephant is the only sequenced mammalian genome in which the SOX11 motif has been lost and replaced by duplications (shown by gray shading) of putative NRF1 binding site elements. Sequences were aligned using ClustalW 2.1 and manually adjusted as needed for maximum parsimony. The putative TF binding sites identified in this study are indicated in bold type (red, NRF1; green, SOX11; purple, Sp1); a poorly conserved putative site for Elk1 (Canbaz et al. 2011) is also shown (pink); yellow shading, highly conserved SOX11 motif; gray shade (human sequence), upstream transcription start site (TSS); INIT, translation start site for the 68 kDa spastin isoform; \*, nucleotide positions conserved in all aligned sequences; ^, nucleotide positions conserved in 90% (17 of 19) of aligned sequences.



**NRF1** **TSS**

|            |                      |                 |                             |          |                          |                                            |                     |                             |                            |                                     |                             |    |
|------------|----------------------|-----------------|-----------------------------|----------|--------------------------|--------------------------------------------|---------------------|-----------------------------|----------------------------|-------------------------------------|-----------------------------|----|
| rabbit     | AAAGGCACGGAAGGGCGTGC | <b>GTGCGTGC</b> | CGCG                        | -----    | GCCGGCGCTCGGAGCTTCCT     | ---                                        | TGGCGC-TGAGA-GGACGG | ----                        | A-GA--GAAGGGGGGTTGGAGCCA-- | CC                                  |                             |    |
| pika       | AAAGGCACGGA          | -----           | AGGCA <b>TCGCGTGC</b>       | CGCG     | -----                    | GCCGGCGCTCGGAGCT-CCT                       | ---                 | GGCGCTGAGA-GGACGG           | ----                       | GCGA--GCA <b>GGCGGG</b> TTGGGGTTA-- | CC                          |    |
| mouse      | CCATTACCGA           | -----           | GGACGTGC                    | CGCGTGC  | CCCG                     | -----                                      | GCCGCCGACGCGAGGTGCC | ----                        | AGCGCCAGG-GGACAG           | ----                                | AAGG--AAAGGAGGGGCAGGAGCCA-- | CC |
| human      | AAAAACACGGG          | -----           | AAGAC <b>TCGCGTGC</b>       | CGCG     | -----                    | GCCGCCGCTGGGAGCCACC                        | ----                | AGCGCGGAGA-GGACAGCGACAGG    | ----                       | AAGGGAGGGGCCCCGAGCCA--              | CC                          |    |
| macaque    | AAAAACACGGG          | -----           | AAGAC <b>TCGCGTGC</b>       | CGCG     | -----                    | GCCGCCGCTGGGAGCCACC                        | ----                | AGCGCGGAGA-GGACAGTGGCAGG    | ----                       | AAGGGAGGGGCCCGAGCCA--               | CC                          |    |
| marmoset   | AAAAACACGGG          | --              | AAGACGGAC <b>TCGCGTGC</b>   | CGCG     | -----                    | GCCGCCGCTGGGAGCCACC                        | ----                | AAGCGCAGAGA-GGACAGCGGCAAG   | ----                       | GAGGGAGGGGCCAATCCA--                | CC                          |    |
| bushbaby   | AAAGACACAGG          | -----           | AGAAC <b>TCGCGTGC</b>       | CGCG     | -----                    | GCGGCCGCTCGGAGCTATC                        | ----                | AGCGGCTGAGA-GGACAG          | ----                       | AGG--GAGGGAGGGGCTGGAGCCT--          | TC                          |    |
| pig        | AAAGACACGGG          | -----           | AGGGC <b>TCGCGTGC</b>       | ACGCG    | CGCG                     | -----                                      | GCCGCCGCTCGGAGTTACC | ----                        | AAGCCGAGAGA-GGACGG         | ----                                | AGA--AAGGGAGGGGCAGGAGCTA--  | CC |
| dolphin    | AAAGACTCGGG          | -----           | AGGGC <b>TCGCGTACGCGTGC</b> | CGCG     | CCCCGGCCGCGGTTCTGAGCTACC | -----                                      | GAGCGCTGAGA-GGAC    | -----                       | AGA--GAGGGAGGGGCAGGAGCTA-- | CC                                  |                             |    |
| cow        | AAAGAGTCGGG          | -----           | AGGG <b>TCGCGTGC</b>        | CGCTCCCG | -----                    | GCCGCCGCTCTGAGCTACC                        | ----                | GAACAGCAAGA-GGACAG          | ----                       | AGA--GAGGGAGGGGCAGGAGCCA--          | CC                          |    |
| horse      | AAAGACACGGG          | -----           | AGGGC <b>TCGCGTGC</b>       | CGCGTGC  | -----                    | GCCGCCGCTCTGAGCTACC                        | ----                | AGCGACTGAGA-GGACAG          | ----                       | AGA--GAGGGAGGGGCAGGAGCCA--          | CC                          |    |
| megabat    | AAAGACACGGG          | -----           | <b>CGGGTGC</b>              | CGCGCAC  | -----                    | GCGGCCGCTCTGAGCTATATCAGAGGCGGATGAGA-GGACAG | ----                | ACAC--GGGGAGGAGCAGGATCCG    | ----                       | CG                                  |                             |    |
| cat        | AAAGACATGGG          | -----           | <b>TGTGCGTGC</b>            | CGCGTGC  | CGCG                     | -----                                      | GTCACCGCTCGGAGCTACC | ----                        | AGGAGCTGAGA-GGACAC         | ----                                | CGA--GAGGGCGGGGCAGGAGCTA--  | CC |
| dog        | AAAGCCATGGGCAGGCG    | <b>TCGCGTGC</b> | CGCGTGC                     | CGCG     | -----                    | GCCACCGCTCGGAGCTACC                        | ----                | AGGAGCTGAGG-GGACGC          | ----                       | AGA--GCGGGAGGGGCAGGAGCCG--          | CC                          |    |
| ferret     | AAAGACATGGG          | -----           | CAGGC <b>TCGCGTGC</b>       | CGCG     | -----                    | GCCACAGCTCGGAGCTACC                        | ----                | AGGAGCTGAGA-GGACAC          | ----                       | AGA--GCGGGAGGGGCAGGAACA--           | CC                          |    |
| microbat   | AAAGAGAGGGG          | -----           | CGGG <b>CTGCACGCG</b>       | CGCG     | -----                    | GCCGCCGCTCTGAGCTCCT                        | ---                 | AGAGGCGCGGAGA-GGACAG        | ----                       | AGA--GAGGGAGGGGCAGAAGCCA--          | CC                          |    |
| tenrec     | AAAGCCTCGGA          | -----           | AGAAGC <b>TCGCGTGC</b>      | CGTGC    | -----                    | GTCGTGCGCTGCGCTACC                         | ----                | AGCGCGGAGA-GTACAG           | ----                       | CGA--GAGGGAGGGGCTGGTGTGTCAGACC      |                             |    |
| guinea pig | CAGGACGCGGG          | -----           | AGAGC <b>TCGCGTGC</b>       | CGCG     | -----                    | GCCGCCGCTCTACGTTACC                        | ----                | GGGCATTAGAAAAGGACAGAGG-GAGC | ---                        | GAGGGAGGGGCTGGAGCCG--               | T                           |    |
| hedgehog   | AAAAAGACTGG          | -----           | AGGCC <b>TCACGCGTGC</b>     | CGCGAGA  | --                       | GACCGCCGCTCCGAGCTGCC                       | ----                | GGCAGCCGAGG-GGACGC          | ----                       | GGTTCGGAGGGAGGGGCAGGAGTCCGAGCC      |                             |    |
|            | ^^^                  | *               | ^^*^^*^^*^^*                |          |                          | ^ ^ *^^ ^^* ^^                             |                     | ^ ^^* *^^*                  |                            | ** *^^*^ ^                          | ^^                          |    |

|            |                                                        |       |                                                      |                                |             |                                                          |                       |                |                |  |
|------------|--------------------------------------------------------|-------|------------------------------------------------------|--------------------------------|-------------|----------------------------------------------------------|-----------------------|----------------|----------------|--|
|            |                                                        |       |                                                      |                                |             |                                                          | <b>Sp1</b>            | <b>Sp1</b>     |                |  |
| rabbit     | GACCG                                                  | ----- | AAGGAGGAGGAGGAGGAGGAGGAGAAAGGGTTGTGCTCTTGCC          | -----                          | GAGCGA      | <b>GGGGCGGG</b> CCG                                      | <b>CGGGCGG</b> CGCGTG | --             | CAGGTGCCGAGCTC |  |
| pika       | GACCG                                                  | ----- | AGGAGGAGGAGGAGGAGGAGGAGAAAGGGTTGTGCTCTCGCC           | -----                          | GAGCGA      | <b>GGGGCGGG</b> CCG                                      | <b>CGGGCGG</b> CGCGAG | --             | CAGGTGCCGAGCTA |  |
| mouse      | GGCCGCGGCGGGAGGAGGAGGAGGAGGAGGAGACGGGGTTGTGCTCCTGGCCAG | ----- | CTGAGGAGCGA                                          | <b>GGGGCGGG</b> CCGGCAGCGCGCTG | --          | CAGGTGCCAGGCTC                                           |                       |                |                |  |
| human      | GACTGC                                                 | ----- | AGGAGGA-GAAG--GGGTTGTGCTCCTGGCCGA                    | -----                          | GGAAGGAGAAA | <b>GGGGCGGG</b> CC <b>GGCGGG</b> CAGCGTGC                | --                    | GCAGTGCCGAGCTC |                |  |
| macaque    | GACTGC                                                 | ----- | AGGAGGA-GAAG--GGGTTGTGCTCCTGGCCGA                    | -----                          | GGAAGGAGAAA | <b>GGGGCGGG</b> CC <b>GGCGGG</b> CAGCGCGC                | --                    | GCGGTGCCGAGCCC |                |  |
| marmoset   | GACTGC                                                 | ----- | AGGAGGAAGAAG--GGGTTGTGCTCCTGGCCGA                    | -----                          | GGAAGGAGAAA | <b>GGGGCGGG</b> CC <b>GGCGGG</b> CAGCGCGC                | --                    | GCGGTGCCGAGCGC |                |  |
| bushbaby   | GACAGC                                                 | ----- | TGGAGAAGGAGACCGGGTTGTGCTCCTGAGCGC                    | -----                          | GGAAGGAGAAA | <b>GGGGCGGG</b> CCGGCGGACAGTGTGTG                        | --                    | AAGGTGCCGAGCTC |                |  |
| pig        | GACCAA                                                 | ----- | AGGAGGAGGAGAAGGGTTGTGCTCCTGACCTA                     | -----                          | GCGAGGAGAAA | <b>GGGGCGGG</b> CCGTCCAGCTGCGCGCG                        | --                    | GAGGTGCCGAGCTC |                |  |
| dolphin    | GACCGC                                                 | ----- | AGGAGGAGGAGAAGGGTTGTGCTCCTGGCCGA                     | -----                          | GCAAGGAGAAA | <b>GGGGCGGG</b> CTGGAGAGCAGCGCGC                         | --                    | GGGTGCCGAGCTC  |                |  |
| cow        | GACCGC                                                 | ----- | CGGAGGA--GAAGGGTTGTGCTCCTGGACGA                      | -----                          | GCGAGGAGAAA | <b>GGGGCGGG</b> CCGGCAGCAGCGCGC                          | --                    | GAGGTGCCCGCTC  |                |  |
| horse      | GACCGC                                                 | ----- | AGGAGGAGGAGAAGGGTTGTGCTCCTGGCCGA                     | -----                          | GCGAGGAGAAA | <b>GGGGCGGG</b> CCGGCAAGCAGTGCCTG                        | --                    | GAGGTGCCGAGCTC |                |  |
| megabat    | GACCGC                                                 | ----- | TGGAGGAGGAGAAGGGTTGTGCTCCCGCCGT                      | -----                          | GCGAGGAGAAG | <b>GGGGCGGG</b> -CCGGCAGCGCGCTG                          | --                    | AAGAGGCCGAGCTC |                |  |
| cat        | GACCGC                                                 | ----- | TGGAGGAGGA-AAGGGTTGTGCTCCTGGCCGA                     | -----                          | GCGCGGAGAAA | <b>GGGGCGGG</b> AGCCTGCGAGCAGCGCTG                       | --                    | GAGGTGCCGAGCTC |                |  |
| dog        | GACCGC                                                 | ----- | AGGAGGAGGA-AAGGGTTGTGCTCCTGGCCGA                     | -----                          | GCGAGGAGAAA | <b>GGGGCGGG</b> CC <b>GGCGGG</b> CAGCGCGT                | --                    | GAGGTGCCGAGCTC |                |  |
| ferret     | GACCGC                                                 | ----- | TGGAGGAGGA-AAGGGTTGTGCTCCTGGCCGA                     | -----                          | GCGAAGAGAAA | <b>GGGGCGGG</b> CCGGCAGCAGCGCGT                          | --                    | GAGGTGCCGAGCTC |                |  |
| microbat   | GACCTC                                                 | ----- | AGGAAG-GGAGAAGGGTTGTGCTCCTGGCCGC                     | -----                          | ACGCAGAGAAA | <b>GGGGCGGG</b> CC <b>GGCGGG</b> CGCGC                   | --                    | AAGGTGCCGAGCTC |                |  |
| tenrec     | GGCCGC                                                 | ----- | TGGAGAAG--AGGTTGTGCTCCTCGCCTC                        | -----                          | GGAAGGAGAAA | <b>GGGGCGGG</b> CC <b>GGCGGG</b> CCGCGCTGTGGAGGTGCCGGCTC |                       |                |                |  |
| guinea pig | GACC-C                                                 | ----- | GGCGGAGAAGGCGCTGTGCTCCC-GCCGA                        | -----                          | CGGAAGGACAG | <b>GGGGCGGG</b> CC <b>GGCGGG</b> CGCGTG                  | --                    | CAGGTGCCCTGCGG |                |  |
| hedgehog   | GGCGCC                                                 | ----- | GCAGGAGGCGGAGA-GGGTTGCGCTCTCAGCCGCCACAGCGGCAACGAGGAA | <b>GGGGCGGG</b> CCG            | -----       | CGCGCC--GAGGGCCGAGC-C                                    |                       |                |                |  |
|            | *^*                                                    | ^     | ^^^ ^ ^                                              | ^^*^^*^^*^^*                   | * *         | *^ ^^^*^^*^^*^^* ^                                       | ^ ^ ^ *^^ ^           | ^^*^           | ** ^           |  |
