# Supplementary material for: Transcriptional and Post-Transcriptional Regulation of SPAST, the Gene Most Frequently Mutated in Hereditary Spastic Paraplegia
Source: PubMed Central journal article supplement (PMC3344893; doi:10.1371/journal.pone.0036505), 2012-05-04
Supplement: pone.0036505.s006.pdf [file pone.0036505.s006.pdf]

**Table S2. PCR primers used in this study.**

| Category                                                     | Primer # | Sequence                               |
|--------------------------------------------------------------|----------|----------------------------------------|
| mouse <i>Spast</i> promoter F, ChIP                          | RN3345   | 5' -CAGAGAAAGGGGCATAGCAG-3'            |
| mouse <i>Spast</i> promoter R, ChIP                          | RN3346   | 5' -CTCGGTGAATGGCTCTGGTG-3'            |
| mouse <i>Snurf-Snrpn</i> promoter F, ChIP                    | RN2142   | 5' -GCAAAAATGTGCGCATGTG-3'             |
| mouse <i>Snurf-Snrpn</i> promoter R, ChIP                    | RN2143   | 5' -CTCTCCTCTCTGCGCTAGTCTTG-3'         |
| human <i>SPAST</i> promoter F, ChIP                          | RN3515   | 5' -TCTCCAGGGCTGCCGACGTGAG-3'          |
| human <i>SPAST</i> promoter R, ChIP                          | RN3516   | 5' -TTCTGTGCTGCTGTCTCTCCGC-3'          |
| human <i>SNURF-SNRPN</i> enhancer F, ChIP                    | RN3890   | 5' -GAAGGCTATGTCGAAATAACCTG-3'         |
| human <i>SNURF-SNRPN</i> enhancer R, ChIP                    | RN3891   | 5' -CGGCTCTACAGGGAGGAAGC-3'            |
| human <i>SPAST</i> F, qRT-PCR                                | RN3430   | 5' -GACTGATGGATACTCAGGAAG-3'           |
| human <i>SPAST</i> R, qRT-PCR                                | RN3431   | 5' -GGCAGACATATTTCTTCACCTG-3'          |
| human <i>NRF1</i> F, qRT-PCR                                 | RN2540   | 5' -GGAGTGATGTCCGCACAGAA-3'            |
| human <i>NRF1</i> R, qRT-PCR                                 | RN2541   | 5' -CCGTAGTGCCCTGGGTCCAT-3'            |
| human <i>SOX11</i> F, qRT-PCR                                | RN3896   | 5' -GTTCGACCTGAGCTTGAATTTTC-3'         |
| human <i>SOX11</i> R, qRT-PCR                                | RN3897   | 5' -tccttatccaccagcgacagg-3'           |
| human <i>GAPDH</i> F, qRT-PCR                                | RN2547   | 5' -CGCCCCACTTGATTTTGG-3'              |
| human <i>GAPDH</i> R, qRT-PCR                                | RN2546   | 5' -ATGGAAATCCCATCACCATCTT-3'          |
| human <i>SPAST</i> promoter ( <i>Mlu</i> ) F                 | RN3470   | 5' -GCTTACGCGTTGAGCCGAACCTGCACATTGG-3' |
| Human <i>SPAST</i> promoter ( <i>Xho</i> ) R                 | RN3471   | 5' -CATACTCGAGGTCTCAGGAGCTCCGCACTG-3'  |
| Human <i>SPAST</i> 5'-promoter ( <i>Kpn</i> ) <sup>a</sup> F | RN4113   | 5' -AAAAGGTACCGGCCAATTATCCTTCGGAG-3'   |
| Human <i>SPAST</i> 5'-promoter ( <i>Mlu</i> ) R              | RN4114   | 5' -CATAACGCGTCGTCCGCAGCCCTGGAGAGC-3'  |

<sup>a</sup> PCR primer from Canbaz et al. (2011).

Canbaz D, Kırımtay K, Karaca E, Karabay A (2011) SPG4 gene promoter regulation via Elk1 transcription factor. *J Neurochem* 117: 724-734
